# Supplementary material for: Iron speciation in soda-lime-silica glass: a comparison of XANES and UV-vis-NIR spectroscopy
Source: Royal Society of Chemistry journal article supplement (doi:10.1039/c5ja00046g), 2015-01-01
Supplement: c5ja00046g1.pdf [file c5ja00046g1.pdf]

Supplementary Table: Evaluation of the Fe<sup>2+</sup> content in archaeological glasses. All values of Fe<sup>2+</sup> and Fe<sub>tot</sub> are given in elemental wt%, while the centroid is in eV.

| Sample  | Centroid | XANES                 |                  | A <sub>1100nm</sub> | UV vis NIR            |                  | EPMA<br>Fe <sub>tot</sub> |
|---------|----------|-----------------------|------------------|---------------------|-----------------------|------------------|---------------------------|
|         |          | Fe <sup>2+</sup> /ΣFe | Fe <sup>2+</sup> |                     | Fe <sup>2+</sup> /ΣFe | Fe <sup>2+</sup> |                           |
| YER1.7  | 7113.81  | 0.12                  | 0.16             | 0.145               | 0.10                  | 0.13             | 1.32                      |
| YER1.10 | 7112.99  | 0.66                  | 0.81             | 0.811               | 0.55                  | 0.67             | 1.22                      |
| YER2.1  | 7113.78  | 0.14                  | 0.22             | 0.253               | 0.14                  | 0.22             | 1.56                      |
| YER2.3  | 7113.86  | 0.09                  | 0.06             | 0.033               | 0.06                  | 0.04             | 0.63                      |
| YER3.1  | 7113.90  | 0.06                  | 0.08             | 0.044               | 0.04                  | 0.05             | 1.23                      |
| YER3.2  | 7113.79  | 0.14                  | 0.07             | 0.026               | 0.06                  | 0.03             | 0.51                      |
| YER3.3  | 7113.88  | 0.08                  | 0.18             | 0.215               | 0.08                  | 0.19             | 2.38                      |
| YER4.4  | 7113.86  | 0.09                  | 0.06             | 0.034               | 0.06                  | 0.04             | 0.65                      |
| YER4.5  | 7113.02  | 0.64                  | 0.23             | 0.260               | 0.61                  | 0.22             | 0.37                      |
| YER4.8  | 7113.19  | 0.53                  | 0.17             | 0.174               | 0.47                  | 0.15             | 0.32                      |
| YER4.9  | 7113.24  | 0.49                  | 0.15             | 0.193               | 0.55                  | 0.17             | 0.30                      |
| YER5.1  | 7113.17  | 0.54                  | 0.60             | 0.745               | 0.55                  | 0.62             | 1.12                      |
| YER5.4  | 7113.20  | 0.52                  | 0.54             | 0.661               | 0.53                  | 0.55             | 1.03                      |
| YER5.8  | 7113.27  | 0.48                  | 0.12             | 0.124               | 0.44                  | 0.11             | 0.25                      |
| YER6.1  | 7113.03  | 0.63                  | 0.15             | 0.199               | 0.73                  | 0.17             | 0.24                      |
| YER6.3  | 7113.23  | 0.50                  | 0.18             | 0.209               | 0.52                  | 0.18             | 0.35                      |
| YER6.6  | 7113.92  | 0.05                  | 0.08             | 0.091               | 0.05                  | 0.09             | 1.68                      |
| YER7.5  | 7112.98  | 0.66                  | 0.25             | 0.281               | 0.64                  | 0.24             | 0.38                      |
| YER7.9  | 7113.14  | 0.56                  | 0.16             | 0.175               | 0.54                  | 0.15             | 0.29                      |
| YER8.1  | 7113.19  | 0.53                  | 0.61             | 0.622               | 0.45                  | 0.52             | 1.16                      |
| YER8.3  | 7112.97  | 0.67                  | 0.24             | 0.301               | 0.71                  | 0.26             | 0.36                      |
| TR1.2   | 7113.23  | 0.50                  | 0.30             | 0.303               | 0.43                  | 0.26             | 0.59                      |
| TR1.3   | 7113.35  | 0.42                  | 0.17             | 0.298               | 0.65                  | 0.25             | 0.39                      |
| TR1.5   | 7113.55  | 0.29                  | 0.10             | 0.069               | 0.20                  | 0.07             | 0.34                      |
| TR1.6   | 7113.17  | 0.54                  | 0.29             | 0.292               | 0.46                  | 0.25             | 0.54                      |
| TR2.3   | 7113.70  | 0.19                  | 0.09             | 0.127               | 0.23                  | 0.11             | 0.49                      |
| TR2.7   | 7113.55  | 0.29                  | 0.13             | 0.165               | 0.32                  | 0.15             | 0.46                      |
| TR2.9   | 7113.53  | 0.31                  | 0.10             | 0.121               | 0.35                  | 0.11             | 0.31                      |
